# Supplementary material for: Evaluation of different diagnostic methods for spinal tuberculosis infection
Source: BMC Infect Dis. 2023 Oct 18;23:695. doi: 10.1186/s12879-023-08655-5 (PMC10583401; doi:10.1186/s12879-023-08655-5)
Supplement: Supplementary file 1 — Supplementary Material 1 [file 12879_2023_8655_MOESM1_ESM.xlsx]

## Sheet: Table S1
Supplemental Table 1 Descriptions of all cases
Patient ID	Sex	Age	Clinical diagnosis	T-SPOT	Xpert MTB/RIF	MGIT 960 culture	mNGS detected pathogenic pathogens	mNGS detected other non-pathogenic pathogens
1	Male	20	Spinal tuberculosis	+	-	-	Mycobacterium tuberculosis	Propionibacterium acnes
2	Female	75	Spinal tuberculosis	+	+（Sensitive）	-	Mycobacterium tuberculosis	Propionibacterium acnes
3	Female	63	Spinal tuberculosis	+	-	-	Mycobacterium tuberculosis	Escherichia coli	Salmonella enterica	Enterobacter cloacae	Acinetobacter baumannii
4	Male	61	Spinal tuberculosis	+	-	-	Mycobacterium tuberculosis	Pseudomonas fluorescens
5	Female	80	Spinal tuberculosis	+	-	-	Mycobacterium tuberculosis	Pseudomonas aeruginosa
6	Female	27	Spinal tuberculosis	+	+	+	Mycobacterium tuberculosis	Citrobacter	Flaudic acid Bacillus	Enterobacter cloacae
7	Male	59	Spinal tuberculosis	+	+	+（Sensitive）	Mycobacterium tuberculosis	Lactococcus lactis	Fusarium spp.
8	Male	33	Spinal tuberculosis	+	-	+（Sensitive）	Mycobacterium tuberculosis	Acid-producing Klebsiella	Pseudomonas fluorescens	Pseudomonas aeruginosa	Edwardsiella reticulata
9	Female	69	Spinal tuberculosis	+	+	+（Sensitive）	Mycobacterium tuberculosis	Pseudomonas fluorescens	Pseudomonas spp.
10	Female	50	Spinal tuberculosis	-	-	-	Mycobacterium tuberculosis	Stenotrophomonas maltophilia
11	Male	52	Spinal tuberculosis	-	-	-	Mycobacterium tuberculosis
12	Male	66	Spinal tuberculosis	+	+（Sensitive）	+（Sensitive）	Mycobacterium tuberculosis
13	Female	23	Spinal tuberculosis	+	+（Sensitive）	+（Sensitive）	Mycobacterium tuberculosis
14	Female	72	Spinal tuberculosis	+	+	-	Mycobacterium tuberculosis
15	Male	70	Spinal tuberculosis	+	-	+	Mycobacterium tuberculosis
16	Male	46	Spinal tuberculosis	+	+	+（Sensitive）	Mycobacterium tuberculosis
17	Male	60	Spinal tuberculosis	+	-	-		Salmonella enterica	Mycobacterium tortuosum	Mycobacterium intermedium
18	Female	51	Spinal tuberculosis	+	+	-		Escherichia coli	Flaudic acid Bacillus
19	Male	74	Spinal tuberculosis	+	-	-		Klebsiella pneumoniae	Flaudic acid Bacillus
20	Female	57	Spinal tuberculosis	+	-	-		Bacillus faecalis	Burkholderia pseudomallei
21	Female	26	Spinal tuberculosis	+	+（Sensitive）	-		Bacillus faecalis	Acinetobacter baumannii
22	Female	48	Spinal tuberculosis	+	+	-		Staphylococcus aureus
23	Male	27	Spinal tuberculosis	+	+（Sensitive）	-		Mycobacterium sporadicum	Mycobacterium pubescens
24	Female	65	Spinal tuberculosis	+	-	-		Adjacent to Streptomyces granulosus
25	Female	74	Spinal tuberculosis	+	-	-		Kluyveromyces perfringens	Pseudomembranospora	Rhodotorula prodigiosa
26	Male	67	Spinal tuberculosis	+	+（Sensitive）	-		Human endogenous retrovirus K
27	Male	86	Spinal tuberculosis	+	-	-		Aeromonas moderneus	Mycobacterium avium neointracellulare	Mycobacterium sporadicum	Mycobacterium intermedium
28	Male	25	Spinal tuberculosis	+	+	-		Mycobacterium avium
29	Male	67	Spinal tuberculosis	+	-	-		Enterobacter cloacae	Escherichia coli
30	Female	31	Spinal tuberculosis	+	+	-		Pseudomonas fluorescens	Escherichia coli	Staphylococcus aureus
31	Female	89	Spinal tuberculosis	-	+	+		Serratia marcescens	Salmonella enterica
32	Female	43	Spinal tuberculosis	+	+	+		Clovalella	Raoulia hygroscopicus	Morganella morganii
33	Male	32	Spinal tuberculosis	+	+	+		Cestode	Flaudic acid Bacillus
34	Male	62	Spinal tuberculosis	+	-	-	Not Detected
35	Female	49	Spinal tuberculosis	+	-	-	Not Detected
36	Male	37	Spinal tuberculosis	+	+（Sensitive）	-	Not Detected
37	Male	23	Spinal tuberculosis	+	+（Sensitive）	-	Not Detected
38	Female	40	Spinal tuberculosis	+	+	-	Not Detected
39	Male	57	Spinal tuberculosis	+	-	-	Not Detected
40	Female	49	Spinal tuberculosis	+	-	-	Not Detected
41	Female	53	Spinal tuberculosis	+	+（Sensitive）	+（Sensitive）	Not Detected
42	Female	71	Spinal infection	+	-	-	Actinomyces denticola
43	Male	21	Spinal infection	+	-	-	Rolls-Royce	Malassezia coelicolor
44	Male	59	Spinal infection	-	-	-	Mycobacterium intracellulare
45	Female	50	Spinal infection	-	-	-	Acinetobacter baumannii
46	Male	72	Spinal infection	-	-	-	Acinetobacter baumannii	Escherichia coli
47	Female	43	Spinal infection	+	-	-	Acinetobacter baumannii
48	Female	71	Spinal infection	-	-	-	Staphylococcus epidermidis
49	Male	56	Spinal infection	-	-	-	Staphylococcus epidermidis	Indole-producing Bacillus aureus
50	Male	71	Spinal infection	+	-	-	Staphylococcus epidermidis
51	Male	53	Spinal infection	-	-	-	Brucella abortus
52	Male	65	Spinal infection	-	-	-	Brucella abortus
53	Male	56	Spinal infection	-	-	-	Brucella abortus
54	Male	65	Spinal infection	-	-	-	Brucella abortus
55	Female	33	Spinal infection	-	-	-	Brucella abortus	Mycobacterium tuberculosis	Streptococcus pneumoniae
56	Male	65	Spinal infection	+	-	-	Acid-producing Klebsiella	Enterobacter cloacae	Escherichia coli
57	Male	77	Spinal infection	+	-	-	Acid-producing Klebsiella	Enterobacter cloacae	Salmonella enterica	Escherichia coli
58	Male	64	Spinal infection	-	-	-	Salmonella enterica	Hymenolepis hafnii	Escherichia coli
59	Female	59	Spinal infection	-	-	-	Propionibacterium acnes
60	Male	35	Spinal infection	-	-	-	Propionibacterium acnes
61	Male	45	Spinal infection	-	-	-	Propionibacterium acnes	Pseudomonas spp.
62	Male	62	Spinal infection	-	-	-	Propionibacterium acnes	Mycobacterium turtles	Salmonella enterica	Acinetobacter baumannii
63	Female	42	Spinal infection	-	-	-	Escherichia coli
64	Female	59	Spinal infection	-	-	-	Escherichia coli
65	Male	51	Spinal infection	-	-	-	Escherichia coli
66	Male	84	Spinal infection	-	-	-	Escherichia coli
67	Male	61	Spinal infection	-	-	-	Escherichia coli	Flaudic acid Bacillus	Serratia marcescens	Klebsiella pneumoniae	Aspergillus sclerotiorum
68	Female	62	Spinal infection	+	-	-	Escherichia coli	Salmonella enterica	Cronobacter sakazakii
69	Female	64	Spinal infection	-	-	-	Escherichia coli	Enterobacter cloacae
70	Female	70	Spinal infection	-	-	-	Escherichia coli	Stenotrophomonas maltophilia	Klebsiella pneumoniae	Enterobacter cloacae
71	Female	61	Spinal infection	-	-	-	Cataplasma spp.	Flaudic acid Bacillus	Enterobacter cloacae	Salmonella enterica
72	Male	65	Spinal infection	-	-	-	Clostridium difficile III
73	Male	58	Spinal infection	-	-	-	Short-wave Aeromonas	Para-adjacent bacterium
74	Male	63	Spinal infection	-	-	-	Bacillus short-stable
75	Female	46	Spinal infection	-	-	-	North decarboxylated Lecobacterium	Raoulia hygroscopicus
76	Male	67	Spinal infection	-	-	-	Fecalobacterium fecalis
77	Female	68	Spinal infection	-	-	-	Flaudic acid Bacillus	Staphylococcus epidermidis	Ornithine-degrading Raoulia
78	Male	59	Spinal infection	+	-	-	Flaudic acid Bacillus	Acid-producing Klebsiella
79	Male	65	Spinal infection	-	-	-	Flaudic acid Bacillus	Escherichia coli	Enterobacter cloacae
80	Female	72	Spinal infection	-	-	-	Neisseria desiccata
81	Male	56	Spinal infection	-	-	-	Streptococcus gordonii
82	Male	44	Spinal infection	-	-	-	Hordes	Brucella abortus
83	Male	22	Spinal infection	-	-	-	Fusarium acnes	Interspersed Streptococcus
84	Male	34	Spinal infection	-	-	-	Fusarium acnes
85	Male	34	Spinal infection	-	-	-	Campylobacter briefum	Cataplasma spp.
86	Male	80	Spinal infection	-	-	-	Glucosococcus aureus
87	Male	39	Spinal infection	-	-	-	Glucosococcus aureus
88	Male	13	Spinal infection	-	-	-	Glucosococcus aureus
89	Female	53	Spinal infection	-	-	-	Glucosococcus aureus
90	Female	49	Spinal infection	+	-	-	Fusarium spp.	Fusarium venenatum
91	Female	72	Spinal infection	-	-	-	Streptococcus
92	Male	17	Spinal infection	-	-	-	Staphylococcus Ludunensis
93	Male	65	Spinal infection	-	-	-	Aspergillus oryzae
94	Male	60	Spinal infection	-	-	-	Mucilaginous red yeast
95	Male	65	Spinal infection	-	-	-	Serratia marcescens
96	Female	60	Spinal infection	-	-	-	Enterococcus orientalis	Edwardsiella reticulata
97	Male	34	Spinal infection	+	-	-	Pirostenia rolstonii	Mycobacterium abscessus
98	Male	57	Spinal infection	-	-	-	Adjacent to Streptomyces granulosus	Staphylococcus epidermidis
99	Female	64	Spinal infection	-	-	-	Prevotella
100	Male	52	Spinal infection	-	-	-	Prevotella
101	Female	51	Spinal infection	-	-	-	Lactococcus lactis
102	Female	58	Spinal infection	+	-	-	Lactococcus lactis	Enterococcus orientalis
103	Female	67	Spinal infection	-	-	-	Lactococcus lactis	Flaudic acid Bacillus	Klebsiella pneumoniae
104	Female	59	Spinal infection	+	-	-	Acidophilus Delft
105	Male	59	Spinal infection	-	-	-	Acidophilus Delft	Pseudomonas fluorescens	Micrococcus garciniae	Acid-producing Klebsiella
106	Male	37	Spinal infection	-	-	-	Stenotrophomonas maltophilia
107	Male	51	Spinal infection	-	-	-	Pseudomonas campestris	Brucella
108	Male	59	Spinal infection	-	-	-	Microbacterium spp.	Micrococcus microtii	Prevotella spp.	Streptococcus
109	Female	16	Spinal infection	-	-	-	Lactococcus-free
110	Female	50	Spinal infection	+	-	-	Lactococcus-free	Pseudomonas spp.
111	Male	52	Spinal infection	-	-	-	Werengococcus minor	Streptococcus parahaemolyticus	Daffygold Fungus
112	Male	54	Spinal infection	+	-	-	Streptococcus constellatus	Urethral aerococcus
113	Male	60	Spinal infection	-	-	-	Aspergillus fumigatus
114	Male	56	Spinal infection	+	-	-	Streptococcus pharyngitis
115	Male	32	Spinal infection	-	-	-	Enterobacter cloacae	Cluster-forming panspermia	Serratia marcescens	Fusarium acnes
116	Male	45	Spinal infection	-	-	-	Enterobacter cloacae	Escherichia coli	Enterococcus orientalis	Salmonella enterica
117	Male	57	Spinal infection	-	-	-	Pseudomonas fluorescens
118	Male	54	Spinal infection	-	-	-	Neisseria longum
119	Female	56	Spinal infection	-	-	-	Not Detected
120	Male	61	Spinal infection	-	-	-	Not Detected
121	Male	68	Spinal infection	-	-	-	Not Detected
122	Male	47	Spinal infection	-	-	-	Not Detected
123	Female	7	Spinal infection	-	-	-	Not Detected
124	Female	36	Spinal infection	-	-	-	Not Detected
125	Male	49	Spinal infection	-	-	-	Not Detected
126	Male	62	Spinal infection	-	-	-	Not Detected	Irrelevant bacteria (Malassezia sphericalis)
				+: positive; -: negative.
